# Supplementary material
Source: PubMed Central journal article supplement (PMC6031326)
Supplement: NIHMS951796-supplement-FigureS1.pdf [file NIHMS951796-supplement-FigureS1.pdf]

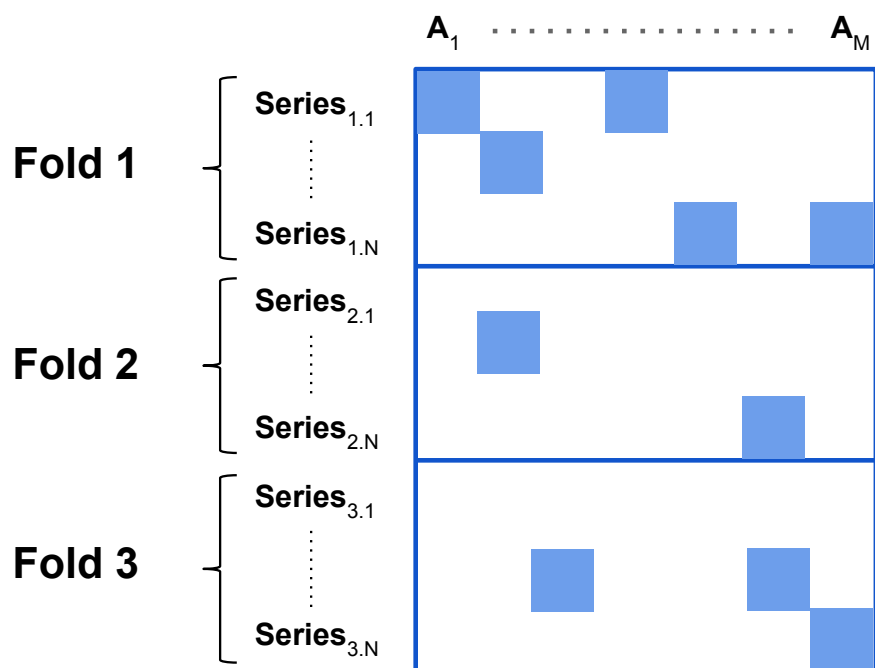

Figure S1: Related to Table 1. **Clustered Cross-Validation for Compound-Protein Activity Prediction.** Every block of rows corresponds to a compound series (of chemical analogs) and every column to an assay.
