# Supplementary material
Source: PubMed Central journal article supplement (PMC6031326)
Supplement: NIHMS951796-supplement-FigureS3.pdf [file NIHMS951796-supplement-FigureS3.pdf]

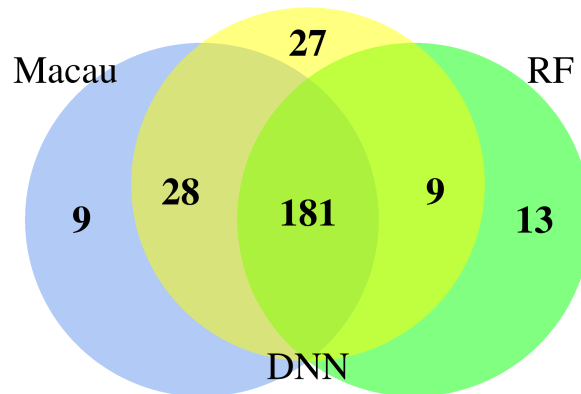

**Figure S3:** Related to Table 1. Venn diagram: number of protein targets with high predictivity (AUC-ROC > 0.7) out of total of 535 targets comparing three methods: Macau, Deep Neural Networks (DNN) and random forest (RF).
