# Supplementary material
Source: PubMed Central journal article supplement (PMC6031326)
Supplement: NIHMS951796-supplement-TableS1.pdf [file NIHMS951796-supplement-TableS1.pdf]

| <b>Hyperparameter</b>   | <b>Considered values</b>                          |
|-------------------------|---------------------------------------------------|
| Number of Hidden Units  | {1024, 2048, 4096}                                |
| Number of Hidden Layers | {1, 2, 3}                                         |
| Learning Rate           | {0.01, 0.05, 0.1}                                 |
| Dropout                 | {no, yes (50% Hidden Dropout, 10% Input Dropout)} |
| Dropout-schedule        | {no, yes}                                         |

**Table S1: Related to Figure 4. Hyperparameters considered for Deep Neural Networks.**
