# Supplementary material
Source: PubMed Central journal article supplement (PMC6031326)
Supplement: NIHMS951796-supplement-TableS2.pdf [file NIHMS951796-supplement-TableS2.pdf]

| Hyperparameter                              | Considered values                      |
|---------------------------------------------|----------------------------------------|
| criterion                                   | {Gini, cross-entropy}                  |
| number of trees                             | {250}                                  |
| number of features considered at each split | $\{1, 2, 3\} \times \sqrt{\#features}$ |

**Table S2: Related to Figure 3. Hyperparameters considered for Random Forests.** The  $\#features$  corresponds to the total number of features (842 in our experiments).
