# Supplementary material
Source: PubMed Central journal article supplement (PMC6031326)
Supplement: NIHMS951796-supplement-TableS3.pdf [file NIHMS951796-supplement-TableS3.pdf]

| Method             | Number of targets |               | AUC-ROC      |
|--------------------|-------------------|---------------|--------------|
|                    | AUC-ROC > 0.9     | AUC-ROC > 0.7 | Mean (Stdev) |
| Macau              | 31                | 218           | 0.65 (0.11)  |
| DNN                | 43                | 245           | 0.67 (0.10)  |
| random forest      | 13                | 203           | 0.63 (0.10)  |
| k-nearest neighbor | 0                 | 93            | 0.57 (0.07)  |

**Table S3: Related to Table 1. Number of protein targets with AUC-ROC above 0.9 and 0.7, and mean of AUC-ROC across assays.** To compute the mean AUC-ROC we first calculated the average for every assay (over its thresholds) and then we calculated their mean and standard deviation (over 535 assays).
